# Supplementary material for: Microglial metabolic flexibility supports immune surveillance of the brain parenchyma
Source: PubMed Central journal article supplement (PMC7096448; doi:10.1038/s41467-020-15267-z), 2020-03-25
Supplement: 41467_2020_15267_MOESM1_ESM.pdf [file 41467_2020_15267_MOESM1_ESM.pdf]

## **Supplementary Information**

Microglial metabolic flexibility supports immune surveillance of the brain parenchyma.

Bernier et al.

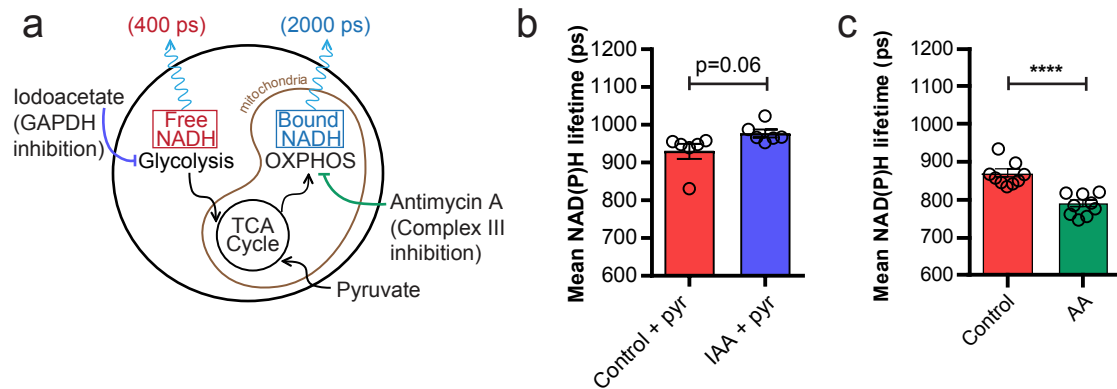

**Supplementary figure 1. Mean NAD(P)H lifetime as a measure of cellular metabolism.** *Related to figures 1, 4, and 6.*

**a**, Schematic representation of inhibitors Iodoacetate (IAA) and Antimycin A (AA), and predicted impacts on NAD(P)H lifetime. **b**, Mean NAD(P)H lifetime of microglia after a 30-minute incubation in aCSF with or without 50  $\mu$ M Iodoacetate in the presence of exogenously added 2 mM pyruvate (pyr) to act as an alternative carbon supply ( $p=0.06$  by unpaired, two-tailed t-test;  $n=6$  slices). **c**, Mean NAD(P)H lifetime of microglia after a 30-minute incubation in aCSF with or without Antimycin A (4  $\mu$ M; \*\*\*\*,  $p=0.0000281$  by unpaired, two-tailed t-test;  $n=9$  slices). Source data are provided as a Source Data file. Data are represented as mean  $\pm$  SEM.

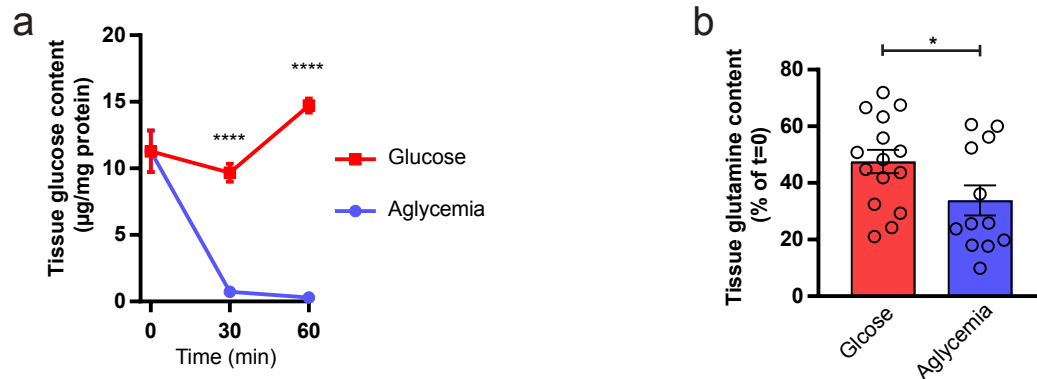

**Supplementary figure 2. Absence of glucose, but presence of glutamine in brain tissue during aglycemia treatment.** *Related to figures 3 to 9.*

**a**, In acute brain slices, glucose within the tissue was measured at indicated time-points during a one-hour incubation in normal glucose-containing aCSF or in aglycemic aCSF. Note that the control (glucose) slices were rinsed in glucose-free aCSF prior to tissue glucose measurement to ensure glucose is not carried directly from the incubation bath aCSF. (n= 3 mice, 15 slices; 30 min: \*\*\*\*, p=0.00009; 60 min: \*\*\*\*, p=0.0000007, two-way ANOVA, Bonferroni post-test). **b**, In acute brain slices, glutamine content was measured after a one-hour incubation in normal glucose-containing aCSF or in aglycemic aCSF. Shown is the remaining glutamine content relative to time 0 (onset of incubation), in %. (n= 6 mice, 15 slices for glucose, 12 slices for aglycemia; \*, p=0.0496 by unpaired, two-tailed t-test). Data are represented as mean  $\pm$  SEM. Source data are provided as a Source Data file.

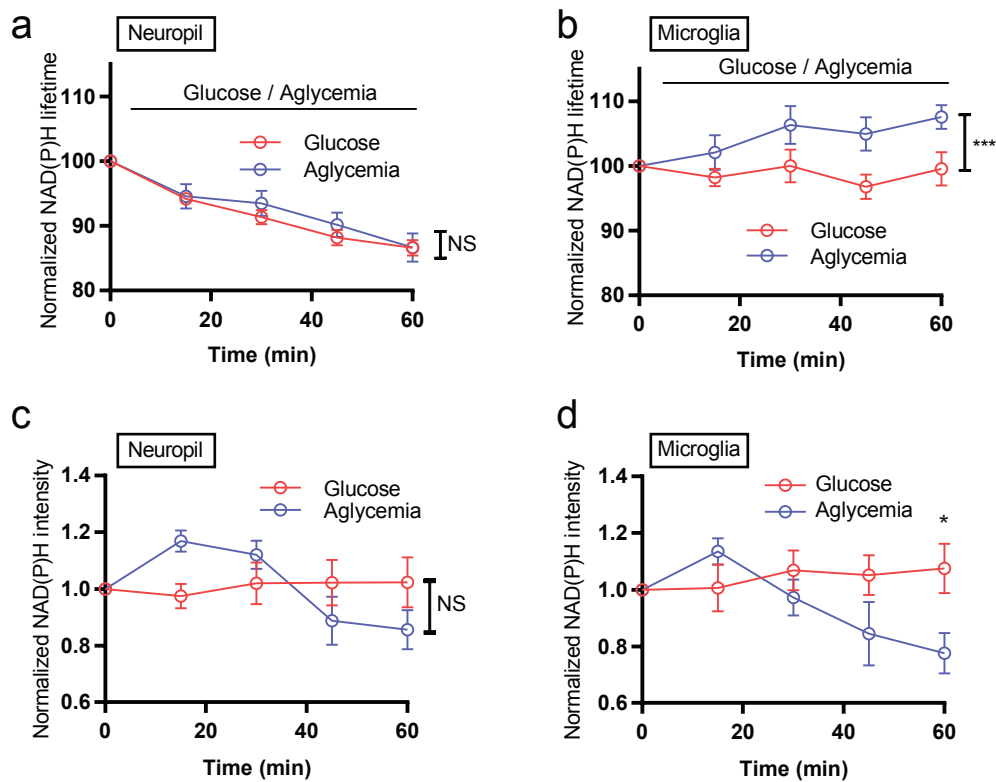

**Supplementary figure 3. NAD(P)H fluorescence lifetime and intensity in situ during aglycemia. Related to figure 4.**

**a**, Mean NAD(P)H lifetime of neuropil during 60 minutes in either glucose-containing aCSF or aglycemic aCSF (Normalized to  $t=0$ ;  $n=4$  mice, 12 neuropil ROIs for glucose, 11 for aglycemia; NS,  $p>0.05$ , two-way ANOVA). **b**, Mean NAD(P)H lifetime of microglia during 60 minutes in either glucose-containing aCSF or aglycemic aCSF (Normalized to  $t=0$ ;  $n=4$  mice, 12 microglia for glucose, 11 for aglycemia; \*\*\*,  $p=0.0001$ , treatment factor, two-way ANOVA). **c**, NAD(P)H fluorescence intensity of neuropil during 60 minutes in either glucose-containing aCSF or aglycemic aCSF, normalized to  $t=0$  ( $n=4$  mice, 12 neuropil ROIs for glucose, 11 for aglycemia; NS,  $p>0.05$ , two-way ANOVA). **d**, NAD(P)H fluorescence intensity of microglia during 60 minutes in either glucose-containing aCSF or aglycemic aCSF, normalized to  $t=0$  ( $n=4$  mice, 12 microglia for glucose, 11 for aglycemia; \*,  $p=0.0322$ , repeated analysis, two-way ANOVA). Data are represented as mean  $\pm$  SEM. . Source data are provided as a Source Data file.

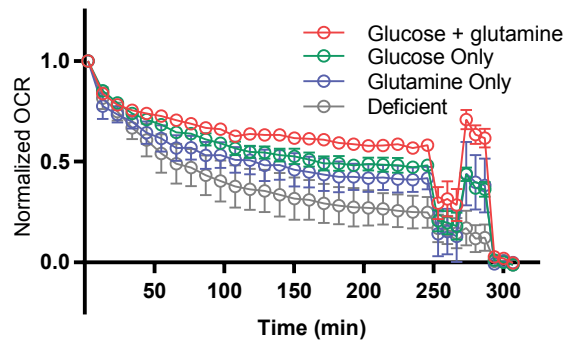

**Supplementary figure 4. Microglial mitochondrial metabolism *in vitro*. Related to figure 5.**

Oxygen consumption rate (OCR) of primary microglia during a Seahorse Extracellular Flux Analyzer mitochondrial stress test including a 4-hour pre-treatment in control (glucose+glutamine), glucose-only, glutamine-only or deficient (no glucose, no glutamine) media (n= 3 experimental trials (Seahorse plates), wells/condition: 19 control; 24 glucose only; 24 glutamine only; 23 deficient). Data in each well is normalized to its initial OCR reading. Data are represented as mean  $\pm$  SEM. Source data are provided as a Source Data file.

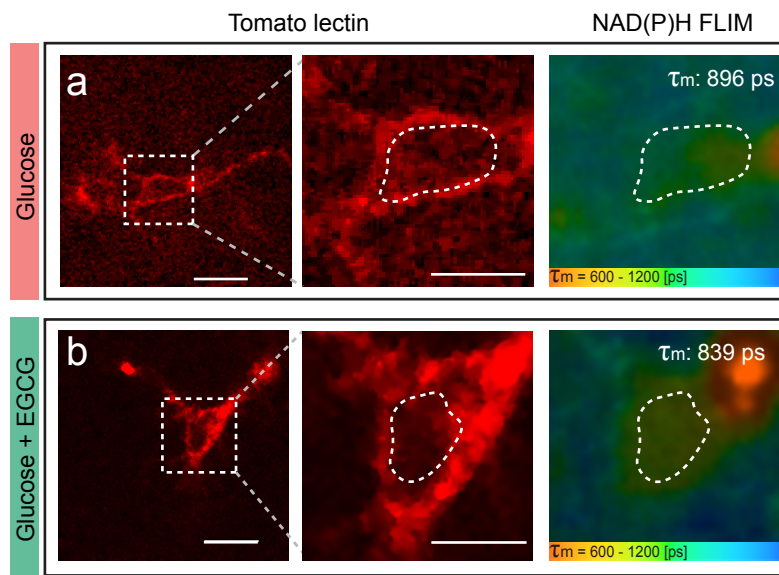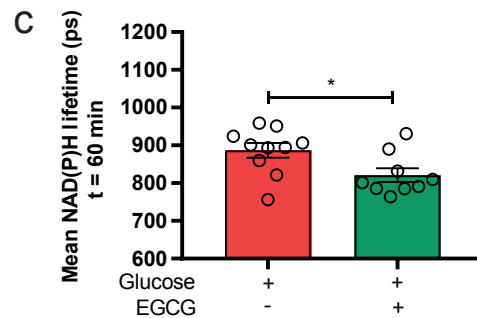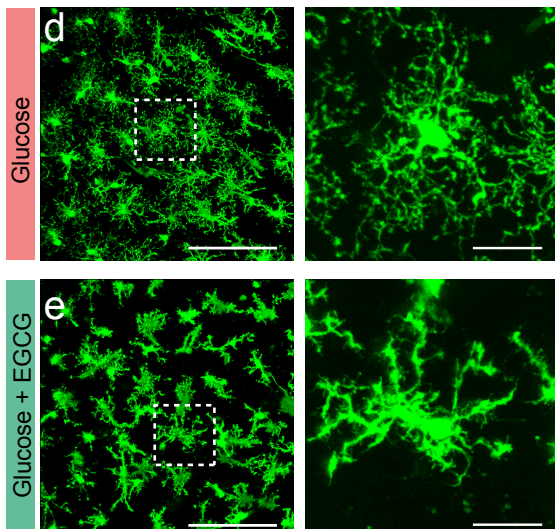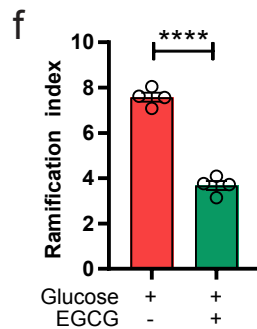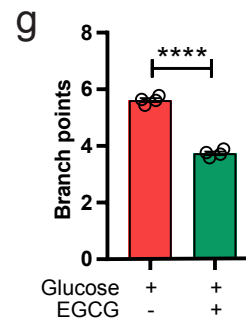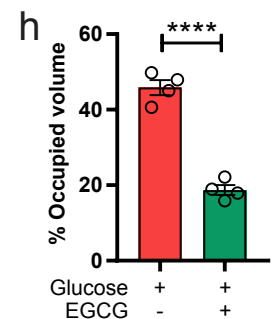

**Supplementary figure 5. Role of microglial glutaminolysis in the presence of glucose.** *Related to figure 6 and 7.* **a,b**, Representative images of FLIM-NAD(P)H imaging of microglia labelled with tomato lectin, following a 60-minute incubation in glucose aCSF (**a**) or glucose aCSF with EGCG (**b**). Indicated on the right panel is the mean NAD(P)H lifetime of the microglial ROI within the dotted line (for **a-c**,  $n = 3$  mice, 10 microglia for glucose,  $n = 3$  mice, 9 microglia for glucose+EGCG). **c**, Mean NAD(P)H lifetime of microglia after a 60-minute incubation in glucose-containing aCSF, with or without EGCG (100  $\mu\text{M}$ ; \*,  $p = 0.0248$ , unpaired, two-tailed t-test). **d,e**, Microglial morphology identified in CX3CR1EGFP/+ acute brain slice following a 60-minute incubation in glucose aCSF (**d**) or glucose aCSF with EGCG (**e**) (for panel **d-h**, glucose:  $n = 4$  mice, 8 slices, 141 cells; glucose+EGCG:  $n = 4$  mice, 8 slices, 142 cells). **f**, Ramification index of microglia 60 minutes after glucose or glucose+EGCG incubation (\*\*\*\*,  $p = 0.000008$ , unpaired, two-tailed t-test). **g**, Number of branch points per microglia (\*\*\*\*,  $p = 0.000001$ , unpaired, two-tailed t-test). **h**, Percentage of brain volume occupied by microglia (\*\*\*\*,  $p = 0.000028$ , unpaired, two-tailed t-test). Data are represented as mean  $\pm$  SEM. Scale bars, 10  $\mu\text{m}$  (**a,b** left panel); 5  $\mu\text{m}$  (**a,b** middle panel); 100  $\mu\text{m}$  (**d,e** left panel); 20  $\mu\text{m}$  (**d,e** right panel). Source data are provided as a Source Data file.

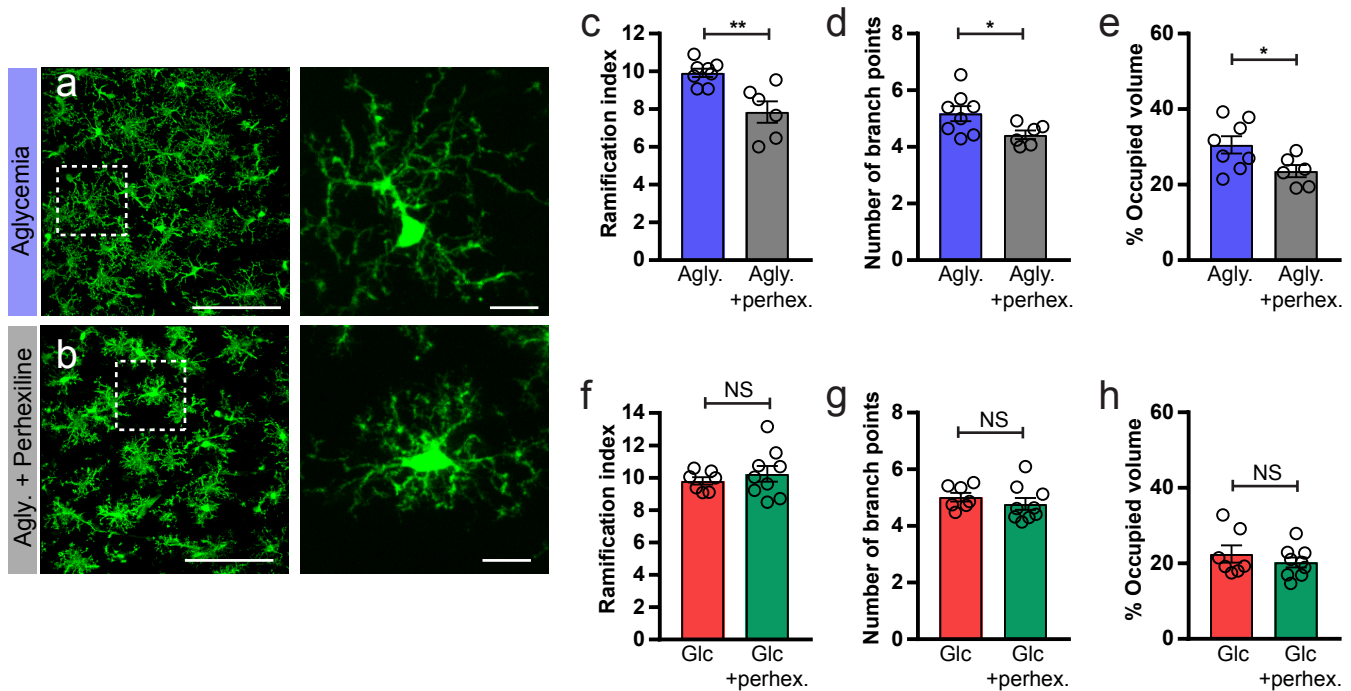

**Supplementary figure 6. CPT1 inhibition by perhexiline during aglycemia reduces microglial ramification.**  
*Related to figure 8.*

**a,b**, Microglial morphology following a 60-minute incubation in aglycemic aCSF (**a**) or aglycemic aCSF with perhexiline (**b**). **c**, Ramification index of microglia 60 minutes after aglycemia or aglycemia+perhexiline incubation (\*\*,  $p=0.0028$ , unpaired, two-tailed t-test; for panels **c-h**, glucose:  $n=4$  mice, 7 slices, 107 cells; glucose+perhexiline:  $n=4$  mice, 9 slices, 99 cells; aglycemia:  $n=4$  mice, 8 slices, 182 cells; aglycemia+perhexiline:  $n=4$  mice, 7 slices, 158 cells). **d**, Number of branch points per microglia (\*,  $p=0.0457$ , unpaired, two-tailed t-test). **e**, Percentage of brain volume occupied by microglia (\*,  $p=0.0389$ , unpaired, two-tailed t-test). **f**, Ramification index of microglia 60 minutes after glucose or glucose+perhexiline incubation (NS,  $p>0.05$ , unpaired, two-tailed t-test). **g**, Number of branch points per microglia (NS,  $p>0.05$ , unpaired, two-tailed t-test). **h**, Percentage of brain volume occupied by microglia (NS,  $p>0.05$ , unpaired, two-tailed t-test). Data are represented as mean  $\pm$  SEM. Scale bars, 100  $\mu$ m (**a,b** left panel); 20  $\mu$ m (**a,b** right panel). Source data are provided as a Source Data file.

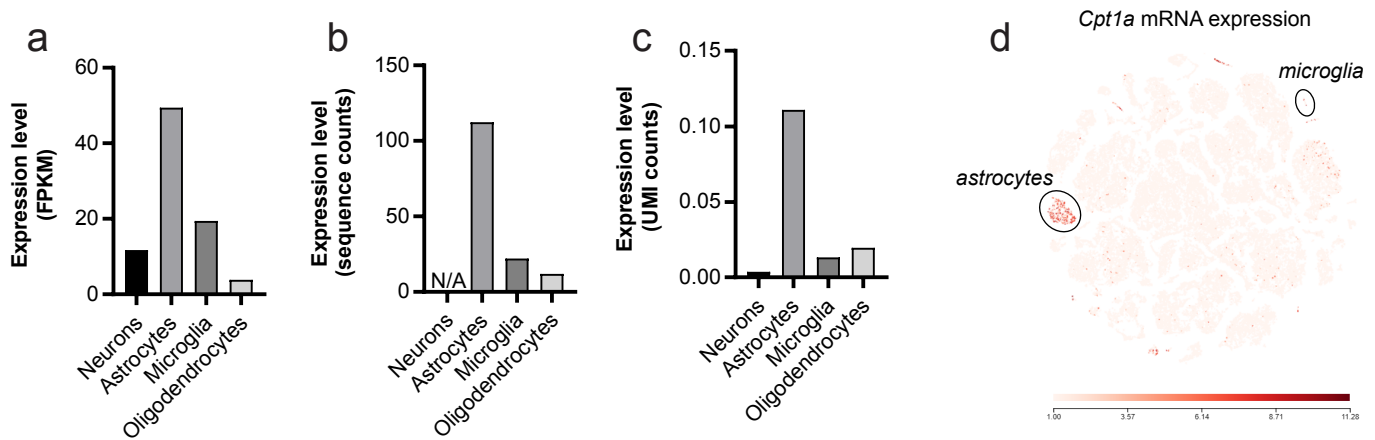

**Supplementary figure 7. Brain *Cpt1a* transcription is mostly observed in astrocytes. Related to figure 8.** *Cpt1a* mRNA transcription level based on the publicly available transcriptomes from (a) ‘Brain RNA-Seq’ by the Barres lab [Zhang et al (2014) DOI: <https://doi.org/10.1523/JNEUROSCI.1860-14.2014>], (b) <http://betsholtzlab.org/VascularSingleCells/database.html> by the Betsholtz lab [Vanlandewijck, M., He, L. et al. Nature, 554, 475-480 (2018); He, L., Vanlandewijck, M. et al. Scientific Data, Volume 5, Article number: 180160 (2018)], and (c) Mousebrain.org by the Linnarsson lab [Zeisel A et al., Cell, 2018 Aug 9;174(4):999-1014.e22]. **d**, Transcription of *Cpt1a* mRNA in single cells clustered by t-SNE analysis, available from the Allen Brain Atlas [Allen Cell Types Database (2015); <https://celltypes.brain-map.org/r-naseq/mouse/cortex-and-hippocampus>]. Source data are provided as a Source Data file.



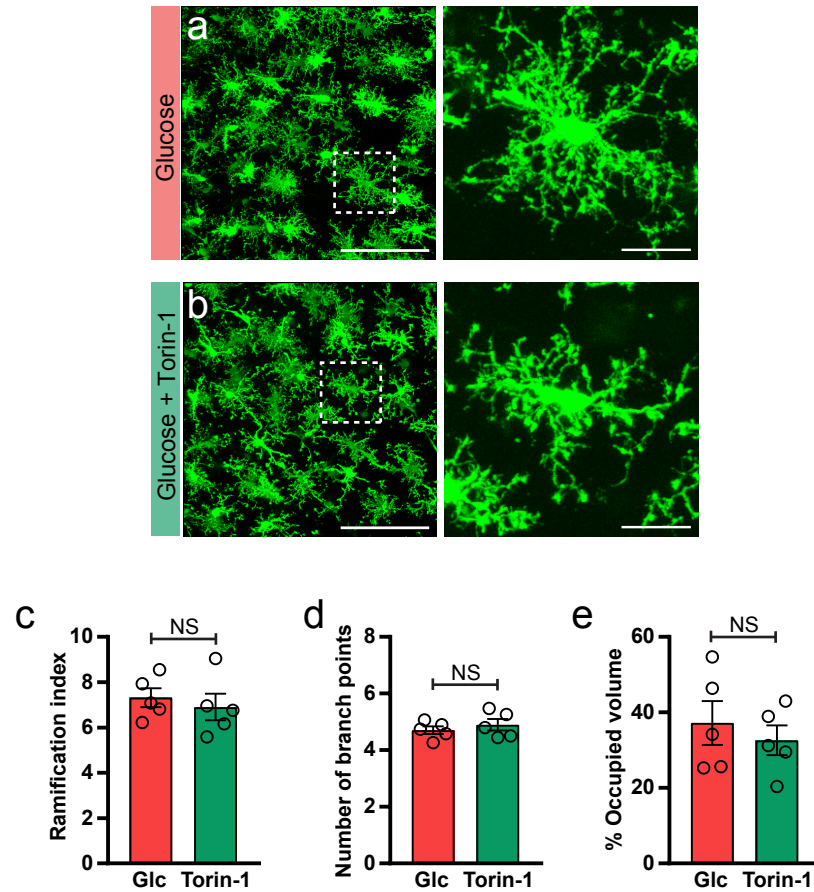

**Supplementary figure 8. mTOR inhibition has no effect of microglial surveillance in the presence of glucose. Related to figure 9.**

**a,b**, Microglial morphology following a 60-minute incubation in glucose aCSF (**a**) or glucose aCSF with Torin-1 (**b**, 10  $\mu$ M). **c**, Ramification index of microglia 60 minutes after glucose or glucose+Torin-1 incubation (NS,  $p > 0.05$ , unpaired, two-tailed t-test; for panels **c-e**, glucose:  $n = 5$  mice, 9 slices, 195 cells; glucose+Torin-1:  $n = 5$  mice, 8 slices, 178 cells). **d**, Number of branch points per microglia (NS,  $p > 0.05$ , unpaired, two-tailed t-test). **e**, Percentage of brain volume occupied by microglia (NS,  $p > 0.05$ , unpaired, two-tailed t-test). Data are represented as mean  $\pm$  SEM. Scale bars, 100  $\mu$ m (**a,b** left panel); 20  $\mu$ m (**a,b** right panel). Source data are provided as a Source Data file.
